# Supplementary material for: Ingredients, structure and reconstitution properties of instant powder foods and the potential for healthy product development: a comprehensive review
Source: Royal Society of Chemistry journal article supplement (doi:10.1039/d3fo04216b), 2023-11-22
Supplement: d3fo04216b1.pdf [file d3fo04216b1.pdf]

## Supplementary materials

| Products                                                      | Protein (g) | Fat (g) | Carbohydrate (g) | Fibre (g) | Total carbohydrate (g) | Protein ratio (%) | Fat ratio (%) | Total carbohydrate ratio (%) | Fibre in total carbohydrates (%) |
|---------------------------------------------------------------|-------------|---------|------------------|-----------|------------------------|-------------------|---------------|------------------------------|----------------------------------|
| Instant Porridges                                             |             |         |                  |           |                        |                   |               |                              |                                  |
| Quaker Oat So Simple Original <sup>1</sup>                    | 11          | 7.7     | 59               | 9         | 68                     | 12.69             | 8.88          | 78.43                        | 13.24                            |
| Quaker Oat So Simple Golden Syrup <sup>2</sup>                | 9           | 6.5     | 67               | 7.3       | 74.3                   | 10.02             | 7.24          | 82.74                        | 9.83                             |
| Quaker Oat So Simple Apple & Blueberry Porridge <sup>3</sup>  | 8.6         | 6.2     | 68               | 7.2       | 75.2                   | 9.56              | 6.89          | 83.56                        | 9.57                             |
| Quaker Oat So Simple Sultanas & Raisins Porridge <sup>4</sup> | 8.3         | 5.7     | 68               | 6.9       | 74.9                   | 9.34              | 6.41          | 84.25                        | 9.21                             |
| Quaker Oat So Simple Banana Porridge <sup>5</sup>             | 8.9         | 6.4     | 67               | 7.2       | 74.2                   | 9.94              | 7.15          | 82.91                        | 9.70                             |
| Quaker Oat So Simple Velvety Chocolate <sup>6</sup>           | 9.8         | 7.6     | 65               | 8         | 73                     | 10.84             | 8.41          | 80.75                        | 10.96                            |
| Quaker Oat So Simple Sweet Cinnamon <sup>7</sup>              | 9           | 6.6     | 67               | 7.4       | 74.4                   | 10.00             | 7.33          | 82.67                        | 9.95                             |
| Quaker Oat So Simple Protein Original Porridge <sup>8</sup>   | 22          | 7.6     | 53               | 7.2       | 60.2                   | 24.50             | 8.46          | 67.04                        | 11.96                            |

|                                                                                                              |      |      |      |     |      |       |       |       |       |
|--------------------------------------------------------------------------------------------------------------|------|------|------|-----|------|-------|-------|-------|-------|
| Quaker Oat So Simple Protein Golden Syrup <sup>9</sup>                                                       | 22   | 5.8  | 56   | 5.9 | 61.9 | 24.53 | 6.47  | 69.01 | 9.53  |
| Moma Jumbo Oat Porridge Peanut Butter & Maple Syrup <sup>10</sup>                                            | 13.2 | 13.4 | 49.8 | 8.3 | 58.1 | 15.58 | 15.82 | 68.60 | 14.29 |
| Moma Porridge Raspberry Chia & Pumpkin Seeds <sup>11</sup>                                                   | 13   | 11.1 | 51.8 | 9.9 | 61.7 | 15.15 | 12.94 | 71.91 | 16.05 |
| Morrisons Syrup Oat <sup>12</sup>                                                                            | 8.5  | 5.8  | 71.3 | 5.4 | 76.7 | 9.34  | 6.37  | 84.29 | 7.04  |
| Morrisons Original Oat <sup>13</sup>                                                                         | 11.1 | 8.1  | 60   | 8.6 | 68.6 | 12.64 | 9.23  | 78.13 | 12.54 |
| 南方黑芝麻糊 (Nangfang Black Sesame Porridge) <sup>14</sup>                                                        | 2.6  | 4    | 28   | N/A | 28   | 7.51  | 11.56 | 80.92 | 0.00  |
| 南方黑芝麻 低糖早餐黑芝麻糊 (Nanfang Black Sesame Porridge Low Sugar Breakfast) <sup>15</sup>                             | 3.2  | 4.8  | 27   | N/A | 27   | 9.14  | 13.71 | 77.14 | 0.00  |
| 北京同仁堂 黑芝麻糊 黑芝麻核桃桑葚粉 (Beijing Tongrentang Black Sesame, Black Bean, Walnut & Mulberry Porridge) <sup>16</sup> | 11.6 | 8.8  | 71.3 | N/A | 71.3 | 12.65 | 9.60  | 77.75 | 0.00  |
| 南方 高山玉米糊                                                                                                     | 4    | 4    | 80   | N/A | 80   | 4.55  | 4.55  | 90.91 | 0.00  |

|                                                                     |      |      |      |     |      |       |       |       |       |  |
|---------------------------------------------------------------------|------|------|------|-----|------|-------|-------|-------|-------|--|
| (Nanfang Corn Porridge) <sup>17</sup>                               |      |      |      |     |      |       |       |       |       |  |
| 捷氏 山药葛根玉米羹<br>(Jesitte Yam, Kudzu & Corn Porridge) <sup>18</sup>    | 5.7  | 0    | 85.7 | N/A | 85.7 | 6.24  | 0.00  | 93.76 | 0.00  |  |
| 蕴青堂南京同仁堂 山药葛根玉米羹 (Yunqing Yam, Kudzu & Corn Porridge) <sup>19</sup> | 6    | 0    | 84.5 | N/A | 84.5 | 6.63  | 0.00  | 93.37 | 0.00  |  |
| 江中猴姑养胃米稀<br>(JZSL Rice Porridge) <sup>20</sup>                      | 9.6  | 4.5  | 81.7 | N/A | 81.7 | 10.02 | 4.70  | 85.28 | 0.00  |  |
| 五谷磨房黑之养核桃芝麻黑豆粉 (Walnut Sesame & Black Bean Porridge) <sup>21</sup>  | 6    | 8.3  | 9.8  | 3.4 | 13.2 | 21.82 | 30.18 | 48.00 | 25.76 |  |
| 五谷磨房 益元八珍粉黑芝麻核桃粉 (Nutritious Grain Porridge) <sup>22</sup>          | 16.1 | 16.2 | 50.4 | 8.2 | 58.6 | 17.71 | 17.82 | 64.47 | 13.99 |  |
| 张宝山 铁棍山药粉 600g (Zhangbaoshan Yam Porridge) <sup>23</sup>            | 4.9  | 8.6  | 76.8 | N/A | 76.8 | 5.43  | 9.52  | 85.05 | 0.00  |  |
| 维维豆奶粉 (Weiwei Soymilk) <sup>24</sup>                                | 16.8 | 13.2 | 59.2 | 4.3 | 63.5 | 17.97 | 14.12 | 67.91 | 6.77  |  |
| 九阳豆浆黑豆纯豆浆粉                                                          | 40   | 24.4 | 12   | 9   | 21   | 46.84 | 28.57 | 24.59 | 42.86 |  |

|                                                                                |      |      |      |      |      |       |       |       |       |
|--------------------------------------------------------------------------------|------|------|------|------|------|-------|-------|-------|-------|
| (Yoyoung Soymilk) <sup>25</sup>                                                |      |      |      |      |      |       |       |       |       |
| 德富祥 五仁咸油茶<br>(Defuxiang Wheat Flour<br>Gruel) <sup>26</sup>                    | 2.1  | 1.7  | 24.6 | N/A  | 24.6 | 7.39  | 5.99  | 86.62 | 0.00  |
| 谷旗 纯杏仁粉 (Guki<br>Almond Milk) <sup>27</sup>                                    | 24.2 | 60.9 | 1.9  | 10.2 | 12.1 | 24.90 | 62.65 | 12.45 | 84.30 |
| Holland & Barrett<br>Slimexpert Golden Syrup<br>Flavour Porridge <sup>28</sup> | 8.1  | 1.5  | 14   | 4.6  | 18.6 | 28.72 | 5.32  | 65.96 | 24.73 |
| Grace Instant Green<br>Banana Porridge <sup>29</sup>                           | 4    | 3.5  | 43   | 2    | 45   | 7.62  | 6.67  | 85.71 | 4.44  |
| Grace Instant Cornmeal<br>Porridge <sup>30</sup>                               | 7.7  | 4.4  | 86.4 | 2.6  | 89   | 7.62  | 4.35  | 88.03 | 2.92  |
| Brave Ape Blueberry &<br>Cinnamon Instant Keto<br>Porridge <sup>31</sup>       | 18   | 33   | 19   | 22   | 41   | 19.57 | 35.87 | 44.57 | 53.66 |
| He Brave Ape Co.<br>Original Keto Porridge <sup>32</sup>                       | 19   | 38   | 13   | 22   | 35   | 20.65 | 41.30 | 38.04 | 62.86 |
| Instant Coffee Mixes                                                           |      |      |      |      |      |       |       |       |       |
| Nescafe Gold<br>Cappuccino<br>Unsweetened Instant<br>Coffee <sup>33</sup>      | 13.2 | 13.9 | 49   | 5.8  | 54.8 | 16.12 | 16.97 | 66.91 | 10.58 |

|                                                                        |      |      |      |     |      |       |       |       |      |
|------------------------------------------------------------------------|------|------|------|-----|------|-------|-------|-------|------|
| Nescafe Gold Cappuccino Instant Coffee <sup>34</sup>                   | 8.8  | 8.1  | 66.4 | 4.2 | 70.6 | 10.06 | 9.26  | 80.69 | 5.95 |
| Nescafe Gold Cappuccino Decaf Unsweetened Instant Coffee <sup>35</sup> | 13.3 | 15.2 | 48.3 | 5.3 | 53.6 | 16.20 | 18.51 | 65.29 | 9.89 |
| Nescafe Gold Cappuccino Instant Coffee <sup>36</sup>                   | 8.8  | 8.1  | 66.4 | 4.2 | 70.6 | 10.06 | 9.26  | 80.69 | 5.95 |
| Nescafe Gold Caramel Latte Instant Coffee <sup>37</sup>                | 8.8  | 10.1 | 67.6 | 2.6 | 70.2 | 9.88  | 11.34 | 78.79 | 3.70 |
| Nescafe Gold Latte Instant Coffee <sup>38</sup>                        | 18.3 | 10.8 | 50.8 | 4.2 | 55   | 21.76 | 12.84 | 65.40 | 7.64 |
| Nescafe Gold Double Choc Mocha <sup>39</sup>                           | 0.9  | 0.9  | 5.8  | 0.6 | 6.4  | 10.98 | 10.98 | 78.05 | 9.38 |
| Nescafe Original 3in1 Instant Coffee <sup>40</sup>                     | 2    | 11.6 | 68.3 | 7.5 | 75.8 | 2.24  | 12.98 | 84.79 | 9.89 |
| Nescafe Gold Skinny Latte Instant Coffee <sup>41</sup>                 | 21.3 | 5.5  | 58   | 3.4 | 61.4 | 24.15 | 6.24  | 69.61 | 5.54 |
| Kenco Instant Cappucino Unsweetened <sup>42</sup>                      | 17   | 17   | 47   | 2.9 | 49.9 | 20.26 | 20.26 | 59.48 | 5.81 |
| Kenco 3in1 Instant Coffee Sachets With Milk & Sugars <sup>43</sup>     | 2.6  | 11   | 78   | 0   | 78   | 2.84  | 12.01 | 85.15 | 0.00 |

|                                                              |     |     |     |     |      |       |       |       |      |
|--------------------------------------------------------------|-----|-----|-----|-----|------|-------|-------|-------|------|
| Kenco 2in1 Instant Coffee Sachets With Milk <sup>44</sup>    | 7.1 | 9   | 73  | 0   | 73   | 7.97  | 10.10 | 81.93 | 0.00 |
| Starbucks Premium Instant Caramel Latte <sup>45</sup>        | 1.7 | 1.2 | 7.6 | 0.3 | 7.9  | 15.74 | 11.11 | 73.15 | 3.80 |
| Starbucks Premium Instant Cinnamon Dolce Latte <sup>46</sup> | 1.7 | 1.2 | 7.8 | 0.3 | 8.1  | 15.45 | 10.91 | 73.64 | 3.70 |
| Instant Hot Chocolates                                       |     |     |     |     |      |       |       |       |      |
| Galaxy Instant Hot Chocolate <sup>47</sup>                   | 5   | 8.9 | 70  | N/A | 70   | 5.96  | 10.61 | 83.43 | 0.00 |
| Galaxy Light Instant Hot Chocolate <sup>48</sup>             | 8.9 | 13  | 53  | N/A | 53   | 11.88 | 17.36 | 70.76 | 0.00 |
| Cadbury Instant Chocolate Break Hot Chocolate <sup>49</sup>  | 8.9 | 8.6 | 70  | 5.9 | 75.9 | 9.53  | 9.21  | 81.26 | 7.77 |
| Options Belgian Chocolate <sup>50</sup>                      | 8.9 | 7.3 | 59  | N/A | 59   | 11.84 | 9.71  | 78.46 | 0.00 |
| Options Belgian Choc Mint <sup>51</sup>                      | 8.9 | 7.2 | 53  | N/A | 53   | 12.88 | 10.42 | 76.70 | 0.00 |
| Morrisons Instant Hot Chocolate <sup>52</sup>                | 0.9 | 0.7 | 9.6 | 0.3 | 9.9  | 7.83  | 6.09  | 86.09 | 3.03 |
| Morrisons Instant Hot Chocolate <sup>53</sup>                | 0.9 | 0.7 | 9.6 | 0.3 | 9.9  | 7.83  | 6.09  | 86.09 | 3.03 |

|                                                                            |     |     |      |     |      |       |       |       |      |
|----------------------------------------------------------------------------|-----|-----|------|-----|------|-------|-------|-------|------|
| Tassimo Hot Chocolate Salted Caramel <sup>54</sup>                         | 1.6 | 1   | 9.1  | 0.4 | 9.5  | 13.22 | 8.26  | 78.51 | 4.21 |
| Nestle Hot Chocolate Mix <sup>55</sup>                                     | 1   | 2   | 15   | 0   | 15   | 5.56  | 11.11 | 83.33 | 0.00 |
| Swiss Miss Marshmallow Hot Cocoa Mix <sup>56</sup>                         | 1   | 2.5 | 34   | 0   | 34   | 2.67  | 6.67  | 90.67 | 0.00 |
| Ghirardelli Double Chocolate Hot <sup>57</sup>                             | 1   | 1   | 22   | 0   | 22   | 4.17  | 4.17  | 91.67 | 0.00 |
| Ovaltine Chocolate Powder <sup>58</sup>                                    | 2.1 | 1.7 | 24.6 | N/A | 24.6 | 7.39  | 5.99  | 86.62 | 0.00 |
| Milkshakes                                                                 |     |     |      |     |      |       |       |       |      |
| Nesquik Banana Flavour Milkshake Mix <sup>59</sup>                         | 3.5 | 1.7 | 9    | 0   | 9    | 24.65 | 11.97 | 63.38 | 0.00 |
| Nesquik Choco-Caramel Flavour Milkshake Mix <sup>60</sup>                  | 3.7 | 1.9 | 8.1  | 0.3 | 8.4  | 26.43 | 13.57 | 60.00 | 3.57 |
| Nesquik Mix <sup>61</sup>                                                  | 8.4 | 4.1 | 74.4 | 8.1 | 82.5 | 8.84  | 4.32  | 86.84 | 9.82 |
| Nesquik Chocolate Flavour Milkshake Mix <sup>62</sup>                      | 3.7 | 1.9 | 8.1  | 0.3 | 8.4  | 26.43 | 13.57 | 60.00 | 3.57 |
| Honey Monster Banana Milkshake Wheat Puffs <sup>63</sup>                   | 9.4 | 1.8 | 73.1 | 6.9 | 80   | 10.31 | 1.97  | 87.72 | 8.63 |
| Carnation Breakfast Essentials High Protein Powder Drink Mix <sup>64</sup> | 10  | 1   | 21   | 0   | 21   | 31.25 | 3.13  | 65.63 | 0.00 |

|                                                                                     |     |     |      |     |      |       |       |       |      |
|-------------------------------------------------------------------------------------|-----|-----|------|-----|------|-------|-------|-------|------|
| Carnation Breakfast Essentials® Original Nutritional Powder Drink Mix <sup>65</sup> | 5   | 1   | 27   | 0   | 27   | 15.15 | 3.03  | 81.82 | 0.00 |
| Carnation Malted Milk, Original <sup>66</sup>                                       | 2   | 1.5 | 16   | 0   | 16   | 10.26 | 7.69  | 82.05 | 0.00 |
| Instant Desserts                                                                    |     |     |      |     |      |       |       |       |      |
| Angel Delight Butterscotch Flavour Instant Dessert <sup>67</sup>                    | 3.5 | 4.3 | 16.2 | 0.5 | 16.7 | 14.29 | 17.55 | 68.16 | 2.99 |
| Angel Delight Strawberry Flavour No Added Sugar Instant Dessert <sup>68</sup>       | 3.6 | 3.8 | 13   | 0.5 | 13.5 | 17.22 | 18.18 | 64.59 | 3.70 |
| Angel Delight Butterscotch Flavour No Added Sugar Instant Dessert <sup>69</sup>     | 3.6 | 4.7 | 12.3 | 0.5 | 12.8 | 17.06 | 22.27 | 60.66 | 3.91 |
| Angel Delight Chocolate Flavour Instant Dessert <sup>70</sup>                       | 3.7 | 3.9 | 15.8 | 0.5 | 16.3 | 15.48 | 16.32 | 68.20 | 3.07 |
| Morrison's Savers Instant Custard Powder <sup>71</sup>                              | 0.5 | 1.5 | 14.1 | 0   | 14.1 | 3.11  | 9.32  | 87.58 | 0.00 |
| Morrison's Instant Custard <sup>72</sup>                                            | 1   | 2.1 | 12.7 | 0.1 | 12.8 | 6.29  | 13.21 | 80.50 | 0.78 |



|                                                                           |     |      |      |     |      |      |       |       |      |
|---------------------------------------------------------------------------|-----|------|------|-----|------|------|-------|-------|------|
| 南国 纯椰子粉 (Nanguo Coconut Powder) <sup>73</sup>                             | 2.4 | 34.9 | 57.9 | N/A | 57.9 | 2.52 | 36.66 | 60.82 | 0.00 |
| Instant Soups                                                             |     |      |      |     |      |      |       |       |      |
| Ainsley Harriot Aromatic Thai Chicken & Lemongrass Cup Soup <sup>74</sup> | 0.3 | 1.2  | 7.5  | 0.1 | 7.6  | 3.30 | 13.19 | 83.52 | 1.32 |
| Batchelors Cup A Soup Hot & Sour <sup>75</sup>                            | 0.5 | 0.5  | 6.7  | 0.5 | 7.2  | 6.10 | 6.10  | 87.80 | 6.94 |
| Batchelors Cup A Soup Broccoli & Cauliflower <sup>76</sup>                | 0.6 | 2    | 5.3  | 0.5 | 5.8  | 7.14 | 23.81 | 69.05 | 8.62 |
| Batchelors Cup A Soup Chicken & Lemongrass <sup>77</sup>                  | 0.7 | 1.6  | 5    | 0.5 | 5.5  | 8.97 | 20.51 | 70.51 | 9.09 |
| Batchelors Cup A Soup Potato & Leek 4 Sachets <sup>78</sup>               | 0.8 | 1.7  | 5.9  | 0.5 | 6.4  | 8.99 | 19.10 | 71.91 | 7.81 |
| Heinz Cream Of Tomato Cup Soup <sup>79</sup>                              | 0.5 | 0.6  | 7.1  | 0.2 | 7.3  | 5.95 | 7.14  | 86.90 | 2.74 |
| Heinz Cream Of Chicken Cup Soup <sup>80</sup>                             | 0.6 | 1.1  | 4.9  | 0.1 | 5    | 8.96 | 16.42 | 74.63 | 2.00 |
| Heinz Vegetable Cup Soup <sup>81</sup>                                    | 0.5 | 0.3  | 6.3  | 0.3 | 6.6  | 6.76 | 4.05  | 89.19 | 4.55 |
| Heinz Minestrone Cup Soup <sup>82</sup>                                   | 0.6 | 0.4  | 5    | 0.3 | 5.3  | 9.52 | 6.35  | 84.13 | 5.66 |

|                                                                              |      |      |      |     |      |       |       |       |      |
|------------------------------------------------------------------------------|------|------|------|-----|------|-------|-------|-------|------|
| Bear Creek Soup Mix,<br>Cheddar Broccoli <sup>83</sup>                       | 2    | 6    | 24   | 0   | 24   | 6.25  | 18.75 | 75.00 | 0.00 |
| Bear Creek Cheddar<br>Potato Soup Mix <sup>84</sup>                          | 2    | 6    | 26   | 0   | 27   | 5.71  | 17.14 | 77.14 | 3.70 |
| Bear Creek Creamy<br>Potato Soup Mix <sup>85</sup>                           | 2    | 3.5  | 24   | 0   | 26   | 6.35  | 11.11 | 82.54 | 7.69 |
| Bear Creek Creamy<br>Chicken Soup Mix <sup>86</sup>                          | 2    | 6    | 25   | 0   | 25   | 6.06  | 18.18 | 75.76 | 0.00 |
| Fitwise Cream Of<br>Mushroom <sup>87</sup>                                   | 15   | 1    | 5    | 0   | 5    | 71.43 | 4.76  | 23.81 | 0.00 |
| Augason Farms Creamy<br>Potato Soup Mix <sup>88</sup>                        | 4    | 8    | 33   | 0   | 33   | 8.89  | 17.78 | 73.33 | 0.00 |
| Potage Of Mushrooms<br>Of Knorr Cup Soup Milk<br>Tailoring <sup>89</sup>     | 2    | 1    | 8    | N/A | 8    | 18.18 | 9.09  | 72.73 | 0.00 |
| Continental Creamy<br>Chicken & Croutons <sup>90</sup>                       | 1.4  | 5.9  | 17.9 | N/A | 17.9 | 5.56  | 23.41 | 71.03 | 0.00 |
| Milk Powder                                                                  |      |      |      |     |      |       |       |       |      |
| Nestle Nido Milk<br>Powder <sup>91</sup>                                     | 25.7 | 28.2 | 36.5 | 0   | 36.5 | 28.43 | 31.19 | 40.38 | 0.00 |
| Kendamil 3 Toddler Milk<br>Formula Powder From 1<br>To 3 Years <sup>92</sup> | 13   | 20.4 | 58   | 1.5 | 59.5 | 13.99 | 21.96 | 64.05 | 2.52 |

|                                                                           |      |      |       |     |       |       |       |       |      |
|---------------------------------------------------------------------------|------|------|-------|-----|-------|-------|-------|-------|------|
| Kendamil 1 First Baby Infant Milk Formula Powder From Birth <sup>93</sup> | 10.1 | 28   | 56    | 1.9 | 57.9  | 10.52 | 29.17 | 60.31 | 3.28 |
| Hipp Organic 2 Follow On Baby Milk Powder From 6 Months <sup>94</sup>     | 1.3  | 3.7  | 7.2   | 0.5 | 7.7   | 10.24 | 29.13 | 60.63 | 6.49 |
| Hipp 3 Growing Up Baby Milk Powder From 1 Year Onwards <sup>95</sup>      | 1.4  | 3.3  | 6     | 0.5 | 6.5   | 12.50 | 29.46 | 58.04 | 7.69 |
| S M A Soya Infant Formula From Birth <sup>96</sup>                        | 1.8  | 3.6  | 6.8   |     | 6.8   | 14.75 | 29.51 | 55.74 | 0.00 |
| Swiss Miss Powder Milk <sup>97</sup>                                      | 8    | 0    | 12    | 0   | 12    | 40.00 | 0.00  | 60.00 | 0.00 |
| Peak Instant Full-Cream Dry Whole Milk Powder <sup>98</sup>               | 24   | 28   | 39    | N/A | 39    | 26.37 | 30.77 | 42.86 | 0.00 |
| Maxigenes Full Cream Instant Milk Powder <sup>99</sup>                    | 8.33 | 9.94 | 14.21 | 0   | 14.21 | 25.65 | 30.60 | 43.75 | 0.00 |
| 伊利中老年高钙低脂奶粉 (Milk Powder) <sup>100</sup>                                  | 21   | 3    | 61.5  | 6.5 | 68    | 22.83 | 3.26  | 73.91 | 9.56 |
| 蒙牛中老年高钙益生菌成人奶粉 (Milk Powder With Probiotics) <sup>101</sup>               | 19.4 | 13   | 57.3  | 1   | 58.3  | 21.39 | 14.33 | 64.28 | 1.72 |
| Devondale Instant Milk                                                    | 3.5  | 4    | 5.6   | N/A | 5.6   | 26.72 | 30.53 | 42.75 | 0.00 |

|                                                                              |      |      |      |     |      |       |       |       |       |
|------------------------------------------------------------------------------|------|------|------|-----|------|-------|-------|-------|-------|
| Powder <sup>102</sup>                                                        |      |      |      |     |      |       |       |       |       |
| Meal Replacements                                                            |      |      |      |     |      |       |       |       |       |
| Morrison's In Shape<br>Strawberry Meal<br>Replacement Drink <sup>103</sup>   | 5.5  | 1.1  | 9.4  | 1.3 | 10.7 | 31.79 | 6.36  | 61.85 | 12.15 |
| Complan Meal<br>Replacement<br>Strawberry <sup>104</sup>                     | 15.4 | 14.8 | 62.4 | 0.1 | 62.5 | 16.61 | 15.97 | 67.42 | 0.16  |
| Complan Meal<br>Replacement<br>Chocolate <sup>105</sup>                      | 15.6 | 14.5 | 60.8 | 1.6 | 62.4 | 16.86 | 15.68 | 67.46 | 2.56  |
| Slimfast Meal Shake<br>Powder Strawberry <sup>106</sup>                      | 5.3  | 1    | 12   | 1.4 | 13.4 | 26.90 | 5.08  | 68.02 | 10.45 |
| Slimfast Meal Shake<br>Powder Chocolate <sup>107</sup>                       | 5.3  | 1.2  | 11   | 1.7 | 12.7 | 27.60 | 6.25  | 66.15 | 13.39 |
| Slimfast Vitality<br>Chocolate Intensity <sup>108</sup>                      | 6    | 1.2  | 7    | 1.9 | 8.9  | 37.27 | 7.45  | 55.28 | 21.35 |
| Slimfast Advanced Keto<br>Fuel Shake Powder Rich<br>Chocolate <sup>109</sup> | 4    | 6.6  | 1.6  | 1.3 | 2.9  | 29.63 | 48.89 | 21.48 | 44.83 |
| Slimfast Advanced Keto<br>Fuel Shake Powder<br>Creamy Vanilla <sup>110</sup> | 4.7  | 7.5  | 1.8  | 0.3 | 2.1  | 32.87 | 52.45 | 14.69 | 14.29 |

|                                                                                             |     |      |      |      |      |       |       |       |       |
|---------------------------------------------------------------------------------------------|-----|------|------|------|------|-------|-------|-------|-------|
| Nu26 Nutritionally Complete Real Food Chocolate Shake <sup>111</sup>                        | 36  | 13   | 30   | 8.2  | 38.2 | 41.28 | 14.91 | 43.81 | 21.47 |
| Yfood Classic Choco Powder <sup>112</sup>                                                   | 6.3 | 4.6  | 7.5  | 1.5  | 9    | 31.66 | 23.12 | 45.23 | 16.67 |
| Yfood Smooth Vanilla Powder <sup>113</sup>                                                  | 6.3 | 4.6  | 7.5  | 1.5  | 9    | 31.66 | 23.12 | 45.23 | 16.67 |
| Form Superblend Chocolate Salted Caramel Protein <sup>114</sup>                             | 50  | 12.3 | 10.8 | 20.3 | 31.1 | 53.53 | 13.17 | 33.30 | 65.27 |
| Holland & Barrett Slimexpert Golden Syrup Flavour Porridge <sup>115</sup>                   | 8.1 | 1.5  | 14   | 4.6  | 18.6 | 28.72 | 5.32  | 65.96 | 24.73 |
| Usn Diet Fuel Vegan Meal Replacement Shake Strawberry <sup>116</sup>                        | 48  | 5.8  | 34   | 1.3  | 35.3 | 53.87 | 6.51  | 39.62 | 3.68  |
| Usn Diet Fuel Vegan Meal Replacement Shake Chocolate <sup>117</sup>                         | 47  | 6.3  | 33   | 1.9  | 34.9 | 53.29 | 7.14  | 39.57 | 5.44  |
| Phd Nutrition Diet Whey Lean Meal Replacement Shake Double Chocolate Flavour <sup>118</sup> | 48  | 6.5  | 29   | 6.8  | 35.8 | 53.16 | 7.20  | 39.65 | 18.99 |
| Forza Shake It Slim Starter Pack <sup>119</sup>                                             | 26  | 6.4  | 48.4 | 6.7  | 55.1 | 29.71 | 7.31  | 62.97 | 12.16 |

|                                                                                      |      |     |      |     |      |       |       |       |       |
|--------------------------------------------------------------------------------------|------|-----|------|-----|------|-------|-------|-------|-------|
| Usn Diet Fuel Meal Replacement Shake Strawberry <sup>120</sup>                       | 25   | 2   | 16   | 0   | 21   | 52.08 | 4.17  | 43.75 | 23.81 |
| Usn Diet Fuel Meal Replacement Shake Vanilla <sup>121</sup>                          | 25   | 2.7 | 17   | 3.4 | 20.4 | 51.98 | 5.61  | 42.41 | 16.67 |
| Protein World Slender Blend Strawberry <sup>122</sup>                                | 56.9 | 4.8 | 19.7 | 7.6 | 27.3 | 63.93 | 5.39  | 30.67 | 27.84 |
| Wonderslim Meal Replacement Shake <sup>123</sup>                                     | 15   | 1.5 | 7    | 0   | 7    | 63.83 | 6.38  | 29.79 | 0.00  |
| Holland & Barrett Slimexpert Meal Replacement Shake Vanilla Flavour <sup>124</sup>   | 16   | 6.4 | 19   | 4.5 | 23.5 | 34.86 | 13.94 | 51.20 | 19.15 |
| Holland & Barrett Slimexpert Meal Replacement Shake Chocolate Flavour <sup>125</sup> | 16   | 6.4 | 19   | 4.5 | 23.5 | 34.86 | 13.94 | 51.20 | 19.15 |
| Protein Shakes                                                                       |      |     |      |     |      |       |       |       |       |
| Phd Diet Whey Vanilla <sup>126</sup>                                                 | 68   | 5   | 12   | 1   | 13   | 79.07 | 5.81  | 15.12 | 7.69  |
| Phd Diet Plant Strawberries & Cream <sup>127</sup>                                   | 77   | 3.2 | 7    | 2.6 | 9.6  | 85.75 | 3.56  | 10.69 | 27.08 |
| Tribe Cocoa & Sea Salt                                                               | 53   | 2.2 | 29   | 4.3 | 33.3 | 59.89 | 2.49  | 37.63 | 12.91 |

|                                                                               |      |      |       |     |       |        |      |       |       |
|-------------------------------------------------------------------------------|------|------|-------|-----|-------|--------|------|-------|-------|
| Protein Shake Pouch <sup>128</sup>                                            |      |      |       |     |       |        |      |       |       |
| Optimum Nutrition Gold Standard 100% Whey Delicious Strawberry <sup>129</sup> | 80   | 4.2  | 4.5   | N/A | 4.5   | 90.19  | 4.74 | 5.07  | 0.00  |
| Optimum Nutrition Serious Mass Powder Vanilla <sup>130</sup>                  | 15   | 1.4  | 77    | N/A | 77    | 16.06  | 1.50 | 82.44 | 0.00  |
| Optimum Nutrition Gold Standard 100% Plant Vanilla <sup>131</sup>             | 68   | 6.1  | 14    | 2.1 | 16.1  | 75.39  | 6.76 | 17.85 | 13.04 |
| Usn Blue Lab Whey Caramel Chocolate <sup>132</sup>                            | 73   | 6    | 8.2   | 4.8 | 13    | 79.35  | 6.52 | 14.13 | 36.92 |
| Usn Blue Lab Whey Vanilla <sup>133</sup>                                      | 76   | 5.8  | 7.6   | 2.6 | 10.2  | 82.61  | 6.30 | 11.09 | 25.49 |
| USN Muscle Fuel Anabolic All-In-Oneshake Chocolate <sup>134</sup>             | 36   | 2.2  | 51    | 2.4 | 53.4  | 39.30  | 2.40 | 58.30 | 4.49  |
| Bio-Synergy Chocolate Whey Better Protein Powder <sup>135</sup>               | 90.6 | 0    | 0     | N/A | 0     | 100.00 | 0.00 | 0.00  | 0.00  |
| Bio-Synergy Whey Hey Brazilian Coffee Protein Powder <sup>136</sup>           | 61.3 | 5.02 | 20.64 | 0   | 20.64 | 70.49  | 5.77 | 23.74 | 0.00  |
| Phd Nutrition Chocolate                                                       | 68   | 5.5  | 11    | 0   | 14    | 77.71  | 6.29 | 16.00 | 21.43 |

|                                                        |      |      |     |      |      |        |       |       |       |
|--------------------------------------------------------|------|------|-----|------|------|--------|-------|-------|-------|
| Peanut Diet Whey Powder <sup>137</sup>                 |      |      |     |      |      |        |       |       |       |
| Phd Nutrition Diet Plant Salted Caramel <sup>138</sup> | 81   | 3.2  | 5   | 2    | 7    | 88.82  | 3.51  | 7.68  | 28.57 |
| Applied Nutrition Collagen Peptides <sup>139</sup>     | 90   | 0    | 0   | 0    | 0    | 100.00 | 0.00  | 0.00  | 0.00  |
| Pe Nutrition Performance Whey Vanilla <sup>140</sup>   | 21.5 | 1.2  | 2.5 | 0.21 | 2.71 | 84.61  | 4.72  | 10.67 | 7.75  |
| Pe Nutrition Performance Whey Chocolate <sup>141</sup> | 20.5 | 1.1  | 1.4 | 0.24 | 1.64 | 88.21  | 4.73  | 7.06  | 14.63 |
| Pe Nutrition Performance Lean Vanilla <sup>142</sup>   | 12   | 1.7  | 7.2 | 3    | 10.2 | 50.21  | 7.11  | 42.68 | 29.41 |
| Pulsin Soya Protein <sup>143</sup>                     | 9    | 0.05 | 0.1 | 0.05 | 0.15 | 97.83  | 0.54  | 1.63  | 33.33 |
| Pulsin Rice Protein Powder <sup>144</sup>              | 80   | 1    | 10  | 8    | 18   | 80.81  | 1.01  | 18.18 | 44.44 |
| Pulsin Supersshake Immunity Red Berry <sup>145</sup>   | 19.6 | 2.5  | 1.2 | 0.9  | 2.1  | 80.99  | 10.33 | 8.68  | 42.86 |



## Reference

1. Quaker Oat So Simple Original, <https://groceries.morrisons.com/products/quaker-oat-so-simple-original-10-sachets-560361011>, Accessed 24 March 2023.
2. Quaker Oat So Simple Golden Syrup, <https://groceries.morrisons.com/products/quaker-oat-so-simple-family-pack-golden-syrup-20-sachets-560362011>, Accessed 24 March 2023.
3. Quaker Oat So Simple Apple & Blueberry Porridge, <https://groceries.morrisons.com/products/quaker-oat-so-simple-apple-blueberry-porridge-sachets-112187011>, Accessed 24 March 2023.
4. Quaker Oat So Simple Sultanas & Raisins Porridge, <https://groceries.morrisons.com/products/quaker-oat-so-simple-sultanas-raisins-porridge-112198011>, Accessed 24 March 2023.
5. Quaker Oat So Simple Banana Porridge, <https://groceries.morrisons.com/products/quaker-oat-so-simple-banana-porridge-10-sachets-532136011>, Accessed 24 March 2023.
6. Quaker Oat So Simple Velvety Chocolate, <https://groceries.morrisons.com/products/quaker-oat-so-simple-velvety-chocolate-10-sachets-542689011>, Accessed 24 March 2023.
7. Quaker Oat So Simple Sweet Cinnamon, <https://groceries.morrisons.com/products/quaker-oat-so-simple-sweet-cinnamon-porridge-112192011>, Accessed 24 March 2023.

8. Quaker Oat So Simple Protein Original Porridge, <https://groceries.morrisons.com/products/quaker-oat-so-simple-protein-original-porridge-sachets-375306011>, Accessed 24 March 2023.
9. Quaker Oat So Simple Protein Golden Syrup, <https://groceries.morrisons.com/products/quaker-oat-so-simple-protein-golden-syrup-porridge-sachets-397928011>, Accessed 24 March 2023.
10. Moma Jumbo Oat Porridge Peanut Butter & Maple Syrup, <https://www.momafoods.co.uk/products/moma-peanut-butter-maple-syrup-microwave-porridge-sachets>, Accessed 24 March 2023.
11. Moma Porridge Raspberry Chia & Pumpkin Seeds, <https://www.momafoods.co.uk/products/raspberry-pumpkin-chia>, Accessed 24 March 2023.
12. Morrisons Syrup Oat, <https://groceries.morrisons.com/products/morrisons-syrup-oat-8-sachets-285764011>, Accessed 24 March 2023.
13. Morrisons Original Oat, <https://groceries.morrisons.com/products/morrisons-original-oat-10-sachets-285763011>, Accessed 24 March 2023.
14. 南方黑芝麻糊 (Nangfang Black Sesame Porridge), <https://item.jd.com/3328903.html>, Accessed 25 March 2023.
15. 南方黑芝麻 低糖早餐黑芝麻糊 (Nangfang Black Sesame Porridge Low Sugar Breakfast), <https://item.jd.com/100014335790.html>, Accessed 25 March 2023.
16. 北京同仁堂 黑芝麻糊 黑芝麻核桃桑葚粉 (Beijing Tongrentang Black Sesame, Black Bean, Walnut & Mulberry Porridge), <https://item.jd.com/10032856711752.html>, Accessed 25 March 2023.

17. 南方 高山玉米糊 (Nanfang Corn Porridge), <https://item.jd.com/850083.html>, Accessed 25 March 2023.
18. 捷氏 山药葛根玉米羹 (Jesitte Yam, Kudzu & Corn Porridge), <https://item.jd.com/100026910945.html>, Accessed 25 March 2023.
19. 蕴青堂南京同仁堂 山药葛根玉米羹 (Yunqing Yam, Kudzu & Corn Porridge), <https://item.jd.com/10060127563485.html>, Accessed 25 March 2023.
20. 江中猴姑养胃米稀 (JZSL Rice Porridge), <https://item.jd.com/100010388978.html>, Accessed 25 March 2023.
21. 五谷磨房黑之养核桃芝麻黑豆粉 (Walnut Sesame & Black Bean Porridge), <https://item.jd.com/6513363.html>, Accessed 25 March 2023.
22. 五谷磨房 益元八珍粉黑芝麻核桃粉 (Nutritious Grain Porridge), <https://item.jd.com/3513141.html>, Accessed 25 March 2023.
23. 张宝山 铁棍山药粉 600g (Zhangbaoshan Yam Porridge), <https://item.jd.com/100010914754.html>, Accessed 25 March 2023.
24. 维维豆奶粉 (Weiwei Soymilk), <https://item.jd.com/306764.html>, Accessed 25 March 2023.
25. 九阳豆浆黑豆纯豆浆粉 (Yoyoung Soymilk), <https://item.jd.com/100019224509.html>, Accessed 25 March 2023.
26. 德富祥 五仁咸油茶 (Defuxiang Wheat Flour Gruel), <https://item.jd.com/100005334874.html>, Accessed 25 March 2023.
27. 谷旗 纯杏仁粉 (Guki Almond Milk), <https://item.jd.com/100027907246.html>, Accessed 25 March 2023.

28. Holland & Barrett Slimexpert Golden Syrup Flavour Porridge, <https://www.hollandandbarrett.com/shop/product/60043961>, Accessed 25 March 2023.
29. Grace Instant Green Banana Porridge, <https://www.walmart.com/ip/Grace-Instant-Green-Banana-Porridge-1-54-oz/15723930>, Accessed 25 March 2023.
30. Grace Instant Cornmeal Porridge, <https://groceries.morrisons.com/products/grace-instant-cornmeal-porridge-599321011>, Accessed 25 March 2023.
31. Brave Ape Blueberry & Cinnamon Instant Keto Porridge, <https://www.braveape.co/products/blueberry-cinnamon-keto-porridge>, Accessed 25 March 2023.
32. He Brave Ape Co. Original Keto Porridge, <https://www.braveape.co/collections/all/products/original-keto-porridge>, Accessed 25 March 2023.
33. Nescafe Gold Cappuccino Unsweetened Instant Coffee, <https://groceries.morrisons.com/products/nescafe-gold-cappuccino-unsweetened-instant-coffee-8-x-sachets-367528011>, Accessed 25 March 2023.
34. Nescafe Gold Cappuccino Instant Coffee, <https://groceries.morrisons.com/products/nescafe-gold-cappuccino-instant-coffee-8-x-sachets-527188011>, Accessed 25 March 2023.
35. Nescafe Gold Cappuccino Decaf Unsweetened Instant Coffee, <https://groceries.morrisons.com/products/nescafe-gold-cappuccino-decaf-unsweetened-instant-coffee-8-x-sachets-444753011>, Accessed 25 March 2023.

36. Nescafe Gold Cappuccino Instant Coffee, <https://groceries.morrisons.com/products/nescafe-gold-cappuccino-instant-coffee-12-sachets-557301011>, Accessed 25 March 2023.
37. Nescafe Gold Caramel Latte Instant Coffee, <https://groceries.morrisons.com/products/nescafe-gold-caramel-latte-instant-coffee-8-x-sachets-348146011>, Accessed 25 March 2023.
38. Nescafe Gold Latte Instant Coffee, <https://groceries.morrisons.com/products/nescafe-gold-latte-instant-coffee-12-x-sachets-557300011>, Accessed 25 March 2023.
39. Nescafe Gold Double Choc Mocha , <https://groceries.morrisons.com/products/nescafe-gold-double-choc-mocha-12-sachets-597194011>, Accessed 25 March 2023.
40. Nescafe Original 3in1 Instant Coffee, <https://www.sainsburys.co.uk/gol-ui/product/nescafe-original-3in1-102g>, Accessed 25 March 2023.
41. Nescafe Gold Skinny Latte Instant Coffee, <https://groceries.morrisons.com/products/nescafe-gold-skinny-latte-instant-coffee-8-x-sachets-250121011>, Accessed 25 March 2023.
42. Kenco Instant Cappuccino Unsweeted, <https://groceries.morrisons.com/products/kenco-instant-cappuccino-unsweeted-597216011>, Accessed 25 March 2023.
43. Kenco 3in1 Instant Coffee Sachets With Milk & Sugars, <https://groceries.morrisons.com/products/kenco-3in1-instant-coffee-sachets-with-milk-sugars-x5-sachets-431213011>, Accessed 25 March 2023.

44. Kenco 2in1 Instant Coffee Sachets With Milk, <https://groceries.morrisons.com/products/kenco-2in1-instant-coffee-sachets-with-milk-x5-sachets-431220011>, Accessed 25 March 2023.
45. Starbucks Premium Instant Caramel Latte, <https://groceries.morrisons.com/products/starbucks-premium-instant-caramel-latte-598242011>, Accessed 25 March 2023.
46. Starbucks Premium Instant Cinnamon Dolce Latte, <https://groceries.morrisons.com/products/starbucks-premium-instant-cinnamon-dolce-latte-598243011>, Accessed 25 March 2023.
47. Galaxy Instant Hot Chocolate, <https://groceries.morrisons.com/products/galaxy-instant-hot-chocolate-210372011>, Accessed 25 March 2023.
48. Galaxy Light Instant Hot Chocolate, <https://groceries.morrisons.com/products/galaxy-light-instant-hot-chocolate-619955011>, Accessed 25 March 2023.
49. Cadbury Instant Chocolate Break Hot Chocolate, <https://groceries.morrisons.com/products/cadbury-instant-chocolate-break-hot-chocolate-jar-113838011>, Accessed 25 March 2023.
50. Options Belgian Chocolate, <https://groceries.morrisons.com/products/options-belgian-chocolate-113843011>, Accessed 25 March 2023.
51. Options Belgian Choc Mint , <https://groceries.morrisons.com/products/options-belgian-choc-mint-113844011>, Accessed 25 March 2023.
52. Morrisons Instant Hot Chocolate, <https://groceries.morrisons.com/products/morrisons-instant-hot-chocolate-250171011>, Accessed 25 March 2023.

53. Morrisons Instant Hot Chocolate, <https://groceries.morrisons.com/products/morrisons-instant-hot-chocolate-250171011>, Accessed 25 March 2023.
54. Tassimo Hot Chocolate Salted Caramel, <https://groceries.morrisons.com/products/tassimo-hot-chocolate-salted-caramel-8-pack-573907011>, Accessed 25 March 2023.
55. Nestle Hot Chocolate Mix, <https://www.nestleusa.com/brands/drinks/nestle-hot-cocoa-mix>, Accessed 25 March 2023.
56. Swiss Miss Marshmallow Hot Cocoa Mix, <https://www.swissmiss.com/classics/milk-chocolate-marshmallow>, Accessed 25 March 2023.
57. Ghirardelli Double Chocolate Hot, <https://www.ghirardelli.com/double-chocolate-hot-cocoa-mix-6-bags-61699cs>, Accessed 25 March 2023.
58. 阿华田可可粉（Ovaltine Chocolate Powder）, <https://item.jd.com/4061158.html>, Accessed 25 March 2023.
59. Nesquik Banana Flavour Milkshake Mix, <https://groceries.morrisons.com/products/nesquik-banana-flavour-milkshake-mix-586173011>, Accessed 25 March 2023.
60. Nesquik Choco-Caramel Flavour Milkshake Mix, <https://groceries.morrisons.com/products/nesquik-choco-caramel-flavour-milkshake-mix-586174011>, Accessed 25 March 2023.
61. Nesquik Mix, <https://groceries.morrisons.com/products/nesquik-mix-576006011>, Accessed 25 March 2023.
62. Nesquik Chocolate Flavour Milkshake Mix, <https://groceries.morrisons.com/products/nesquik-chocolate-flavour-milkshake-mix-587073011>, Accessed 25 March 2023.

63. Honey Monster Banana Milkshake Wheat Puffs , <https://groceries.morrison.com/products/honey-monster-banana-milkshake-wheat-puffs-576009011>, Accessed 25 March 2023.
64. Carnation Breakfast Essentials High Protein Powder Drink Mix, <https://www.carnationbreakfastessentials.com/products/carnation-breakfast-essentials-high-protein-powder-drink-mix>, Accessed 25 March 2023.
65. Carnation Breakfast Essentials® Original Nutritional Powder Drink Mix, <https://www.carnationbreakfastessentials.com/products/carnation-breakfast-essentials-original-powder-drink-mix>, Accessed 25 March 2023.
66. Carnation Malted Milk, Original, <https://www.nestleprofessional.us/nestle-carnation-original-malt-milk-6-x-25lbs>, Accessed 25 March 2023.
67. Angel Delight Butterscotch Flavour Instant Dessert 66g, <https://groceries.morrison.com/products/angel-delight-butterscotch-flavour-instant-dessert-215662011>, Accessed 25 March 2023.
68. Angel Delight Strawberry Flavour No Added Sugar Instant Dessert, <https://groceries.morrison.com/products/angel-delight-strawberry-flavour-no-added-sugar-instant-dessert-519042011>, Accessed 25 March 2023.
69. Angel Delight Butterscotch Flavour No Added Sugar Instant Dessert, <https://groceries.morrison.com/products/angel-delight-butterscotch-flavour-no-added-sugar-instant-dessert-518048011>, Accessed 25 March 2023.
70. Angel Delight Chocolate Flavour Instant Dessert, <https://groceries.morrison.com/products/angel-delight-chocolate-flavour-instant-dessert-265424011>, Accessed 25 March 2023.



71. Morrisons Savers Instant Custard Powder, <https://groceries.morrisons.com/products/morrisons-savers-instant-custard-powder-113456011>, Accessed 25 March 2023.
72. Morrisons Instant Custard, <https://groceries.morrisons.com/products/morrisons-instant-custard-566403011>, Accessed 25 March 2023.
73. 南国 纯椰子粉 (Nanguo Coconut Powder), <https://item.jd.com/331161.html>, Accessed 25 March 2023.
74. Ainsley Harriot Aromatic Thai Chicken & Lemongrass Cup Soup, <https://groceries.morrisons.com/products/ainsley-harriot-aromatic-thai-chicken-lemongrass-cup-soup-318530011>, Accessed 25 March 2023.
75. Batchelors Cup A Soup Hot & Sour, <https://groceries.morrisons.com/products/bachelors-cup-a-soup-hot-sour-4-pack-562763011>, Accessed 25 March 2023.
76. Batchelors Cup A Soup Broccoli & Cauliflower, <https://groceries.morrisons.com/products/bachelors-cup-a-soup-broccoli-cauliflower-4-sachets-216631011>, Accessed 25 March 2023.
77. Batchelors Cup A Soup Chicken & Lemongrass, <https://groceries.morrisons.com/products/bachelors-cup-a-soup-chicken-lemongrass-4-pack-551202011>, Accessed 25 March 2023.
78. Batchelors Cup A Soup Potato & Leek 4 Sachets, <https://groceries.morrisons.com/products/bachelors-cup-a-soup-potato-leek-4-sachets-211429011>, Accessed 25 March 2023.

79. Heinz Cream Of Tomato Cup Soup, <https://groceries.morrisons.com/products/heinz-cream-of-tomato-cup-soup-264769011>, Accessed 25 March 2023.
80. Heinz Cream Of Chicken Cup Soup, <https://groceries.morrisons.com/products/heinz-cream-of-chicken-cup-soup-4-sachets-264770011>, Accessed 25 March 2023.
81. Heinz Vegetable Cup Soup, <https://groceries.morrisons.com/products/heinz-vegetable-cup-soup-264771011>, Accessed 25 March 2023.
82. Heinz Minestrone Cup Soup, <https://groceries.morrisons.com/products/heinz-minestrone-cup-soup-278162011>, Accessed 25 March 2023.
83. Bear Creek Soup Mix, Cheddar Broccoli, <https://bearcreekcountrykitchens.com/product/cheddar-broccoli-soup-mix/>, Accessed 25 March 2023.
84. Bear Creek Cheddar Potato Soup Mix, <https://bearcreekcountrykitchens.com/product/cheddar-potato-soup-mix/>, Accessed 25 March 2023.
85. Bear Creek Creamy Potato Soup Mix, <https://bearcreekcountrykitchens.com/product/creamy-potato-soup-mix/>, Accessed 25 March 2023.
86. Bear Creek Creamy Chicken Soup Mix, <https://bearcreekcountrykitchens.com/product/creamy-chicken-soup-mix/>, Accessed 25 March 2023.
87. Fitwise Cream Of Mushroom, <https://www.fitwisenutrition.com/products/cream-of-mushroom>, Accessed 25 March 2023.
88. Augason Farms Creamy Potato Soup Mix, <https://augasonfarms.com/products/creamy-potato-soup-mix>, Accessed 25 March 2023.

89. Potage Of Mushrooms Of Knorr Cup Soup Milk Tailoring, <https://www.knorr.com/ph/knorr-products/knorr-soups/knorr-cream-of-mushroom-soup.html>, Accessed 25 March 2023.
90. Continental Creamy Chicken & Croutons, <https://www.continental.com.au/p/creamy-chicken-with-cROUTONS.html/09300667025035>, Accessed 25 March 2023.
91. Nestle Nido Milk Powder, <https://groceries.morrisonS.com/products/nestle-nido-milk-powder-246353011>, Accessed 25 March 2023.
92. Kendamil 3 Toddler Milk Formula Powder From 1 To 3 Years, <https://groceries.morrisonS.com/products/kendamil-3-toddler-milk-formula-powder-from-1-to-3-years-372595011>, Accessed 25 March 2023.
93. Kendamil 1 First Baby Infant Milk Formula Powder From Birth, <https://groceries.morrisonS.com/products/kendamil-1-first-baby-infant-milk-formula-powder-from-birth-372593011>, Accessed 25 March 2023.
94. Hipp Organic 2 Follow On Baby Milk Powder From 6 Months, <https://groceries.morrisonS.com/products/hipp-organic-2-follow-on-baby-milk-powder-from-6-months-120978011>, Accessed 25 March 2023.
95. Hipp 3 Growing Up Baby Milk Powder From 1 Year Onwards, <https://groceries.morrisonS.com/products/hipp-3-growing-up-baby-milk-powder-from-1-year-onwards-384260011>, Accessed 25 March 2023.
96. S M A Soya Infant Formula From Birth, <https://groceries.morrisonS.com/products/s-m-a-soya-infant-formula-from-birth-446553011>, Accessed 25 March 2023.

97. Swiss Miss Powder Milk, [https://www.amazon.com/Swiss-Miss-Powder-Milk-45-43/dp/B08H9ZTRGL/ref=sr\\_1\\_22?keywords=instant%2Bmilk%2Bshakes&qid=1673233579&sr=8-22&th=1](https://www.amazon.com/Swiss-Miss-Powder-Milk-45-43/dp/B08H9ZTRGL/ref=sr_1_22?keywords=instant%2Bmilk%2Bshakes&qid=1673233579&sr=8-22&th=1), Accessed 25 March 2023.
98. Peak Instant Full-Cream Dry Whole Milk Powder, [https://www.amazon.com/Peak-Instant-Full-Cream-Powder-400-Grams/dp/B004VUJDYE/ref=sr\\_1\\_42?keywords=instant%2Bmilk%2Bshakes&qid=1673233579&sr=8-42&th=1](https://www.amazon.com/Peak-Instant-Full-Cream-Powder-400-Grams/dp/B004VUJDYE/ref=sr_1_42?keywords=instant%2Bmilk%2Bshakes&qid=1673233579&sr=8-42&th=1), Accessed 25 March 2023.
99. Maxigenes Full Cream Instant Milk Powder, <https://npcitem.jd.hk/2087536.html>, Accessed 25 March 2023.
100. 伊利中老年高钙低脂奶粉 (Milk Powder) , <https://item.jd.com/100012515939.html>, Accessed 25 March 2023.
101. 蒙牛中老年高钙益生菌成人奶粉(Milk Powder With Probiotics), <https://item.jd.com/100009779201.html>, Accessed 25 March 2023.
102. Devondale Instant Milk Powder, <https://npcitem.jd.hk/1938564.html>, Accessed 25 March 2023.
103. Morrisons In Shape Strawberry Meal Replacement Drink , <https://groceries.morrisons.com/products/morrisons-in-shape-strawberry-meal-replacement-drink-506433011>, Accessed 26 March 2023.
104. Complian Meal Replacement Strawberry, <https://groceries.morrisons.com/products/complan-meal-replacement-strawberry-266514011>, Accessed 26 March 2023.
105. Complian Meal Replacement Chocolate, <https://groceries.morrisons.com/products/complan-meal-replacement-chocolate-266516011>, Accessed 26 March 2023.

106. Slimfast Meal Shake Powder Strawberry, <https://groceries.morrisons.com/products/slimfast-meal-shake-powder-strawberry-551324011>, Accessed 26 March 2023.
107. Slimfast Meal Shake Powder Chocolate, <https://groceries.morrisons.com/products/slimfast-meal-shake-powder-chocolate-551332011>, Accessed 26 March 2023.
108. Slimfast Vitality Chocolate Intensity, <https://groceries.morrisons.com/products/slimfast-vitality-chocolate-intensity-573782011>, Accessed 26 March 2023.
109. Slimfast Advanced Keto Fuel Shake Powder Rich Chocolate, <https://groceries.morrisons.com/products/slimfast-advanced-keto-fuel-shake-powder-rich-chocolate-551336011>, Accessed 26 March 2023.
110. Slimfast Advanced Keto Fuel Shake Powder Creamy Vanilla, <https://groceries.morrisons.com/products/slimfast-advanced-keto-fuel-shake-powder-creamy-vanilla-551320011>, Accessed 26 March 2023.
111. Nu26 Nutritionally Complete Real Food Chocolate Shake, <https://www.hollandandbarrett.com/shop/product/nu26-nutritionally-complete-real-food-chocolate-shake-60047365>, Accessed 26 March 2023.
112. Yfood Classic Choco Powder, <https://en.yfood.eu/products/yfood-powder>, Accessed 26 March 2023.
113. Yfood Smooth Vanilla Powder, <https://en.yfood.eu/products/yfood-powder>, Accessed 26 March 2023.

114. Form Superblend Chocolate Salted Caramel Protein, <https://www.hollandandbarrett.com/shop/product/form-superblend-chocolate-salted-caramel-protein-60060581>, Accessed 26 March 2023.
115. Holland & Barrett Slimexpert Golden Syrup Flavour Porridge, <https://www.hollandandbarrett.com/shop/product/holland-barrett-slimexpert-golden-syrup-flavour-porridge-sachets-60043961>, Accessed 26 March 2023.
116. Usn Diet Fuel Vegan Meal Replacement Shake Strawberry, <https://www.hollandandbarrett.com/shop/product/usn-diet-fuel-vegan-meal-replacement-shake-strawberry-60037320>, Accessed 26 March 2023.
117. Usn Diet Fuel Vegan Meal Replacement Shake Chocolate, <https://www.hollandandbarrett.com/shop/product/usn-diet-fuel-vegan-meal-replacement-shake-chocolate-60037319>, Accessed 26 March 2023.
118. Phd Nutrition Diet Whey Lean Meal Replacement Shake Double Chocolate Flavour, <https://www.hollandandbarrett.com/shop/product/phd-nutrition-diet-whey-lean-meal-replacement-shake-double-chocolate-flavour-60048712>, Accessed 26 March 2023.
119. Forza Shake It Slim Starter Pack, <https://www.hollandandbarrett.com/shop/product/forza-shake-it-slim-starter-pack-60006203>, Accessed 26 March 2023.
120. Usn Diet Fuel Meal Replacement Shake Strawberry, <https://www.hollandandbarrett.com/shop/product/usn-diet-fuel-meal-replacement-shake-strawberry-60084294>, Accessed 26 March 2023.
121. Usn Diet Fuel Meal Replacement Shake Vanilla, <https://www.hollandandbarrett.com/shop/product/usn-diet-fuel-meal-replacement-shake-vanilla-6100152221>, Accessed 26 March 2023.

122. Protein World Slender Blend Strawberry, <https://www.hollandandbarrett.com/shop/product/protein-world-slender-blend-strawberry-60017685>, Accessed 26 March 2023.
123. Wonderslim Meal Replacement Shake, [https://www.amazon.com/WonderSlim-Protein-Replacement-Low-Carb-Pudding/dp/B00NTBO4RW/ref=sr\\_1\\_44?keywords=instant+milk+shakes&qid=1673233579&sr=8-44](https://www.amazon.com/WonderSlim-Protein-Replacement-Low-Carb-Pudding/dp/B00NTBO4RW/ref=sr_1_44?keywords=instant+milk+shakes&qid=1673233579&sr=8-44), Accessed 26 March 2023.
124. Holland & Barrett Slimexpert Meal Replacement Shake Vanilla Flavour, <https://www.hollandandbarrett.com/shop/product/holland-barrett-slimexpert-meal-replacement-shake-vanilla-flavour-60043250>, Accessed 26 March 2023.
125. Holland & Barrett Slimexpert Meal Replacement Shake Chocolate Flavour , <https://www.hollandandbarrett.com/shop/product/holland-barrett-slimexpert-meal-replacement-shake-chocolate-flavour-60043251>, Accessed 26 March 2023.
126. Phd Diet Whey Vanilla, <https://groceries.morrisons.com/products/phd-diet-whey-vanilla-563946011>, Accessed 26 March 2023.
127. Phd Diet Plant Strawberries & Cream, <https://groceries.morrisons.com/products/phd-diet-plant-strawberries-cream-564596011>, Accessed 26 March 2023.
128. Tribe Cocoa & Sea Salt Protein Shake Pouch, <https://groceries.morrisons.com/products/tribe-cocoa-sea-salt-protein-shake-pouch-564581011>, Accessed 26 March 2023.
129. Optimum Nutrition Gold Standard 100% Whey Delicious Strawberry, <https://groceries.morrisons.com/products/optimum-nutrition-gold-standard-100-whey-delicious-strawberry-560731011>, Accessed 26 March 2023.

130. Optimum Nutrition Serious Mass Powder Vanilla , <https://www.hollandandbarrett.com/shop/product/optimum-nutrition-serious-mass-vanilla-powder-60005293>, Accessed 26 March 2023.
131. Optimum Nutrition Gold Standard 100% Plant Vanilla, <https://www.hollandandbarrett.com/shop/product/optimum-nutrition-gold-standard-plant-vanilla-60034408>, Accessed 26 March 2023.
132. Usn Blue Lab Whey Caramel Chocolate, <https://groceries.morrisons.com/products/usn-blue-lab-whey-caramel-chocolate-594363011>, Accessed 26 March 2023.
133. Usn Blue Lab Whey Vanilla, <https://groceries.morrisons.com/products/usn-blue-lab-whey-vanilla-594362011>, Accessed 26 March 2023.
134. USN Muscle Fuel Anabolic All-In-Oneshake Chocolate, <https://www.hollandandbarrett.com/shop/product/usn-muscle-fuel-anabolic-all-in-oneshake-chocolate-6100149890>, Accessed 26 March 2023.
135. Bio-Synergy Chocolate Whey Better Protein Powder, <https://groceries.morrisons.com/products/bio-synergy-chocolate-whey-better-protein-powder-52571011>, Accessed 26 March 2023.
136. Bio-Synergy Whey Hey Brazilian Coffee Protein Powder, <https://groceries.morrisons.com/products/bio-synergy-whey-hey-brazilian-coffee-protein-powder-437048011>, Accessed 26 March 2023.
137. Phd Nutrition Chocolate Peanut Diet Whey Powder, <https://groceries.morrisons.com/products/phd-nutrition-chocolate-peanut-diet-whey-powder-406043011>, Accessed 26 March 2023.



138. Phd Nutrition Diet Plant Salted Caramel, <https://www.hollandandbarrett.com/shop/product/phd-nutrition-diet-plant-salted-caramel-60048254>, Accessed 26 March 2023.
139. Applied Nutrition Collagen Peptides, <https://www.hollandandbarrett.com/shop/product/applied-nutrition-collagen-peptides-60046438>, Accessed 26 March 2023.
140. Pe Nutrition Performance Whey Vanilla, <https://www.hollandandbarrett.com/shop/product/pe-nutrition-performance-whey-vanilla-60046034>, Accessed 26 March 2023.
141. Pe Nutrition Performance Whey Chocolate, <https://www.hollandandbarrett.com/shop/product/pe-nutrition-performance-whey-chocolate-60046032>, Accessed 26 March 2023.
142. Pe Nutrition Performance Lean Vanilla, <https://www.hollandandbarrett.com/shop/product/pe-nutrition-performance-lean-protein-vanilla-60046047>, Accessed 26 March 2023.
143. Pulsin Soya Protein, <https://www.hollandandbarrett.com/shop/product/pulsin-soya-protein-1kg-60006973>, Accessed 26 March 2023.
144. Pulsin Rice Protein Powder , <https://www.hollandandbarrett.com/shop/product/pulsin-rice-protein-powder-60042759>, Accessed 26 March 2023.
145. Pulsin Supershake Immunity Red Berry, <https://www.hollandandbarrett.com/shop/product/pulsin-supershake-immunity-red-berry-60034524>, Accessed 26 March 2023.
